# Supplementary material for: Economic Evaluation of State Control, Low Price, and Research-Based Policy for Eating Disorders Treatment in Sweden
Source: medRxiv preprint, doi:10.1101/2023.05.30.23290679, version 1 (2023-06-03)
Supplement: Supplementary information [file 290679_file03.docx]

**Supplementary information:** Södersten, Brodin, and Bergh: Economic Evaluation of State Control, Low Price, and Research-Based Policy for Eating Disorders Treatment in Sweden

**eTable.**Contracted Prices for Six Care Services at the State Control, the Low Price, and the R&D Provider of Eating Disorders Treatment in Region Stockholm

**Contracted Prices for Eating Disorders Treatment**

Region Stockholm contracted three providers of eating disorders treatment, based on three policies: State control, Low price, and Research and Development (R&D).

The main effect of the treatment, remission (absence of an eating disorders diagnosis), has been reported to Region Stockholm1 and information is available for years 2012-2016.2

Contracted prices for years 2012-2016 are available from Region Stockholm.1

All providers were paid for six main care services (eTable). Region Stockholm also contracted the providers separately for other care services and adjusted payments on a yearly basis, comparison between these differences in costs is not possible.

**eTable.Contracted Prices for Six Care Services at the State Control, the Low Price, and the R&D Provider of Eating Disorders Treatment in Region Stockholm**

Abbreviation: SEK, Swedish Crowns

*Average of three visits: by relative (1900 SEK), by a group (800 SEK, and in a network (1900 SEK)

References

1. Region Stockholm. About Region Stockholm. Accessed May 28, 2023. https://www.regionstockholm.se/om-regionstockholm/Information-in-English1

2. Södersten P, Brodin U, Sjöberg J, Zandian M, Bergh C. Treatment outcomes for eating disorders in Sweden: data from the national quality registry. *BMJ Open*. 2019;9(1):e024179. doi:10.1136/bmjopen-2018-024179
